# Supplementary material for: Hybrid Volcanic Episodes within the Orientale Basin, Moon
Source: MDPI journal article supplement (doi:10.3390/rs15071801), 2023-03-28
Supplement: s1 [file s1]

Table S1: The average values of the band parameters of pyroxenes in the O1, O2, O3, O4, O5, K, LV1, LV2, LV3, LV4, LV5, LA1, LA2, and LA3 units, and ages of these units established by past studies.

| Mare Units                               |     | Band-I<br>center<br>( $\mu\text{m}$ ) | Band-II<br>center<br>( $\mu\text{m}$ ) | B-I<br>Area | B-II<br>Area | BAR  | B-I<br>Strength | B-II<br>Strength | Age (Ga)                 |
|------------------------------------------|-----|---------------------------------------|----------------------------------------|-------------|--------------|------|-----------------|------------------|--------------------------|
| Mare Orientale                           | O1  | 0.9618                                | 2.106                                  | 52.3        | 34.65        | 0.7  | 18.26           | 15.1384          | $3.72^c, 2.49^d$         |
|                                          | O2  | 0.9781                                | 2.119                                  | 47.97       | 44.9         | 0.97 | 17.189          | 16.37636         | $3.77^b, 3.72^c, 2.33^d$ |
|                                          | O3  | 0.9905                                | 2.127                                  | 26.96       | 33.07        | 1.28 | 9.75            | 13.065           | $3.77^b, 3.7^c, 2.82^d$  |
|                                          | O4  | 0.9797                                | 2.122                                  | 50.91       | 43.41        | 0.9  | 17.9898         | 16.421           | $2.91^b, 3.72^c, 2.65^d$ |
|                                          | O5  | 0.9684                                | 2.141                                  | 21.73       | 20.72        | 0.95 | 8.38            | 8.59             |                          |
| Kopff                                    | K   | 0.9896                                | 2.076                                  | 54.97       | 48.52        | 0.84 | 17.463          | 17.076           | $3.4, 3.27^c, 2.78^d$    |
| Lacus Veris                              | LV1 | 0.9876                                | 2.12                                   | 40.44       | 33.01        | 0.87 | 14.53           | 14.2962          | $3.44^a, 3.1^c, 3.27^d$  |
|                                          | LV2 | 0.986                                 | 2.106                                  | 37.02       | 39.96        | 1.14 | 14.42           | 15.5958          | $3.22^a, 2.63^c, 3.25^d$ |
|                                          | LV3 | 0.9913                                | 2.127                                  | 51.67       | 40.27        | 0.81 | 18.348          | 16.3791          | $3.36^a, 3.3^c, 3.39^d$  |
|                                          | LV4 | 0.9818                                | 2.123                                  | 51.8        | 38.66        | 0.78 | 18.012          | 15.224           | $2.16^b, 3.24^c, 3.08^d$ |
|                                          | LV5 | 0.9786                                | 2.116                                  | 45.95       | 41.23        | 0.94 | 17.23           | 15.923           | $2.20^b$                 |
| Lacus Autumni                            | LA1 | 0.9671                                | 2.077                                  | 65.26       | 42.19        | 0.65 | 21.32           | 18.56            | $2.03^b, 3.41^c, 3.46^d$ |
|                                          | LA2 | 0.9669                                | 2.06                                   | 56.22       | 75.81        | 1.38 | 20.9            | 23.032           | $1.75^b, 2.01^c, 3.16^d$ |
|                                          | LA3 | 0.9757                                | 2.112                                  | 29.88       | 37.79        | 1.32 | 12.91           | 14.8588          | $2.16^b, 2.27^c, 3.37^d$ |
| <sup>a</sup> Whitten et al. (2011)       |     |                                       |                                        |             |              |      |                 |                  |                          |
| <sup>b</sup> Cho et al. (2012)           |     |                                       |                                        |             |              |      |                 |                  |                          |
| <sup>c</sup> Karthi & Arivazhagan (2022) |     |                                       |                                        |             |              |      |                 |                  |                          |
| <sup>d</sup> Liu et al. (2022)           |     |                                       |                                        |             |              |      |                 |                  |                          |

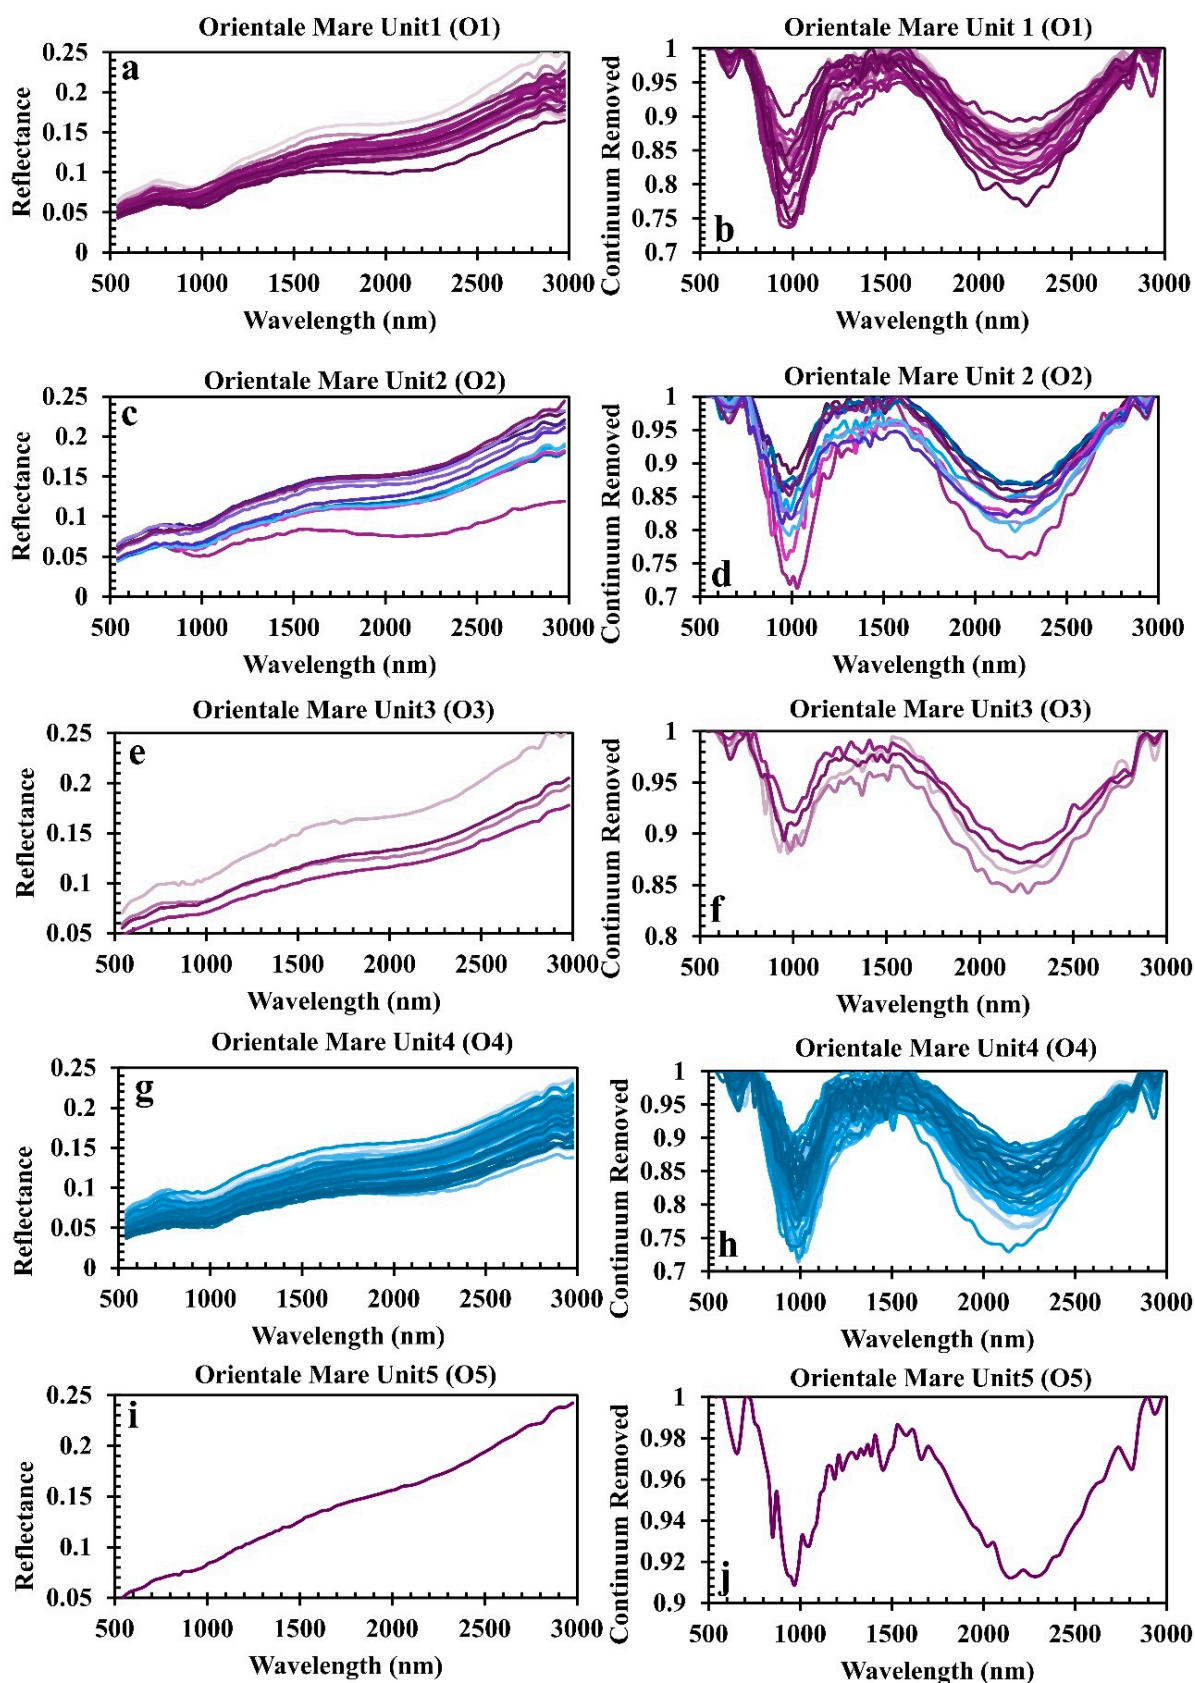

Figure S1: Reflectance spectra of different minerals from the Mare Orientale region are shown in (a-j) Normal reflectance spectra and continuum-removed reflectance spectra for O1, O2, O3, O4, and O5 basaltic units have been plotted. The locations where spectra were collected have been identified and marked in Figure 4.4d.

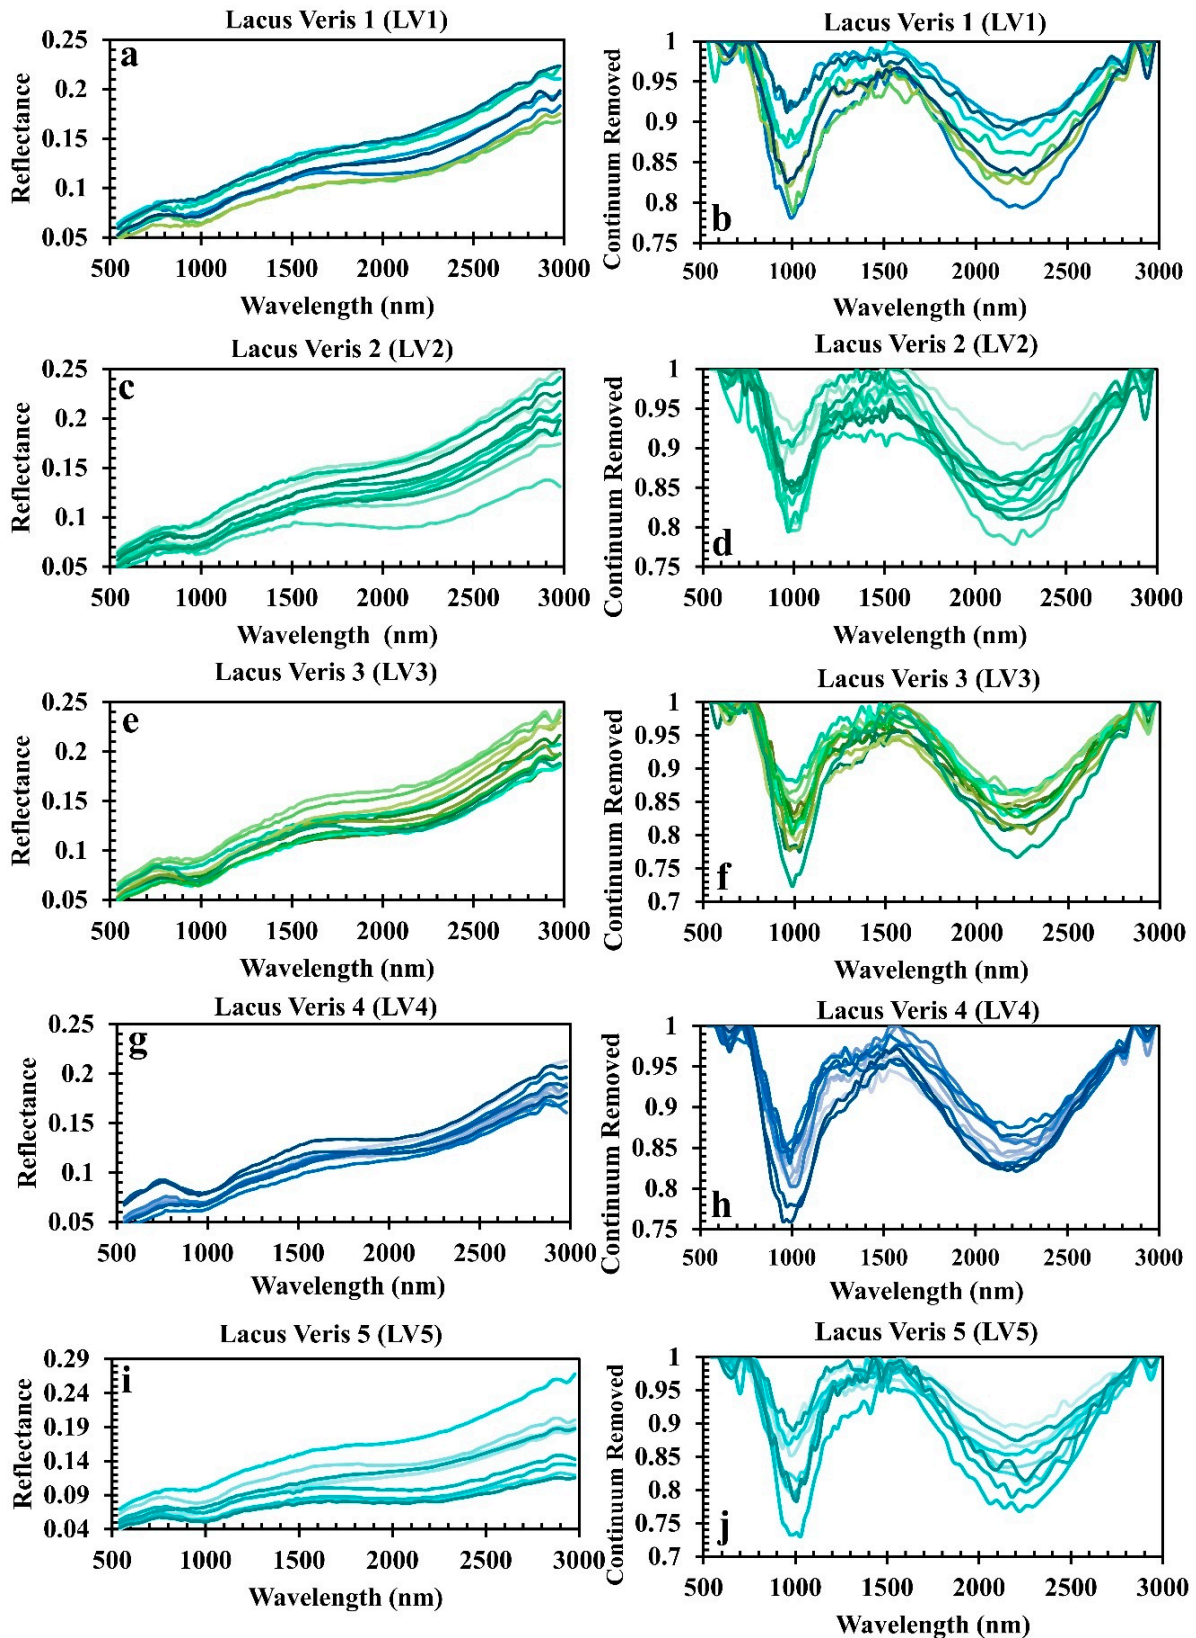

Figure S2: Reflectance spectra of different minerals from the Lacus Veris region are shown in (a-j) . Normal reflectance spectra and continuum-removed reflectance spectra for LV1, LV2, LV3, LV4, and LV5 basaltic units have been plotted. The locations where spectra were collected have been identified and marked in Figure 4.4d.

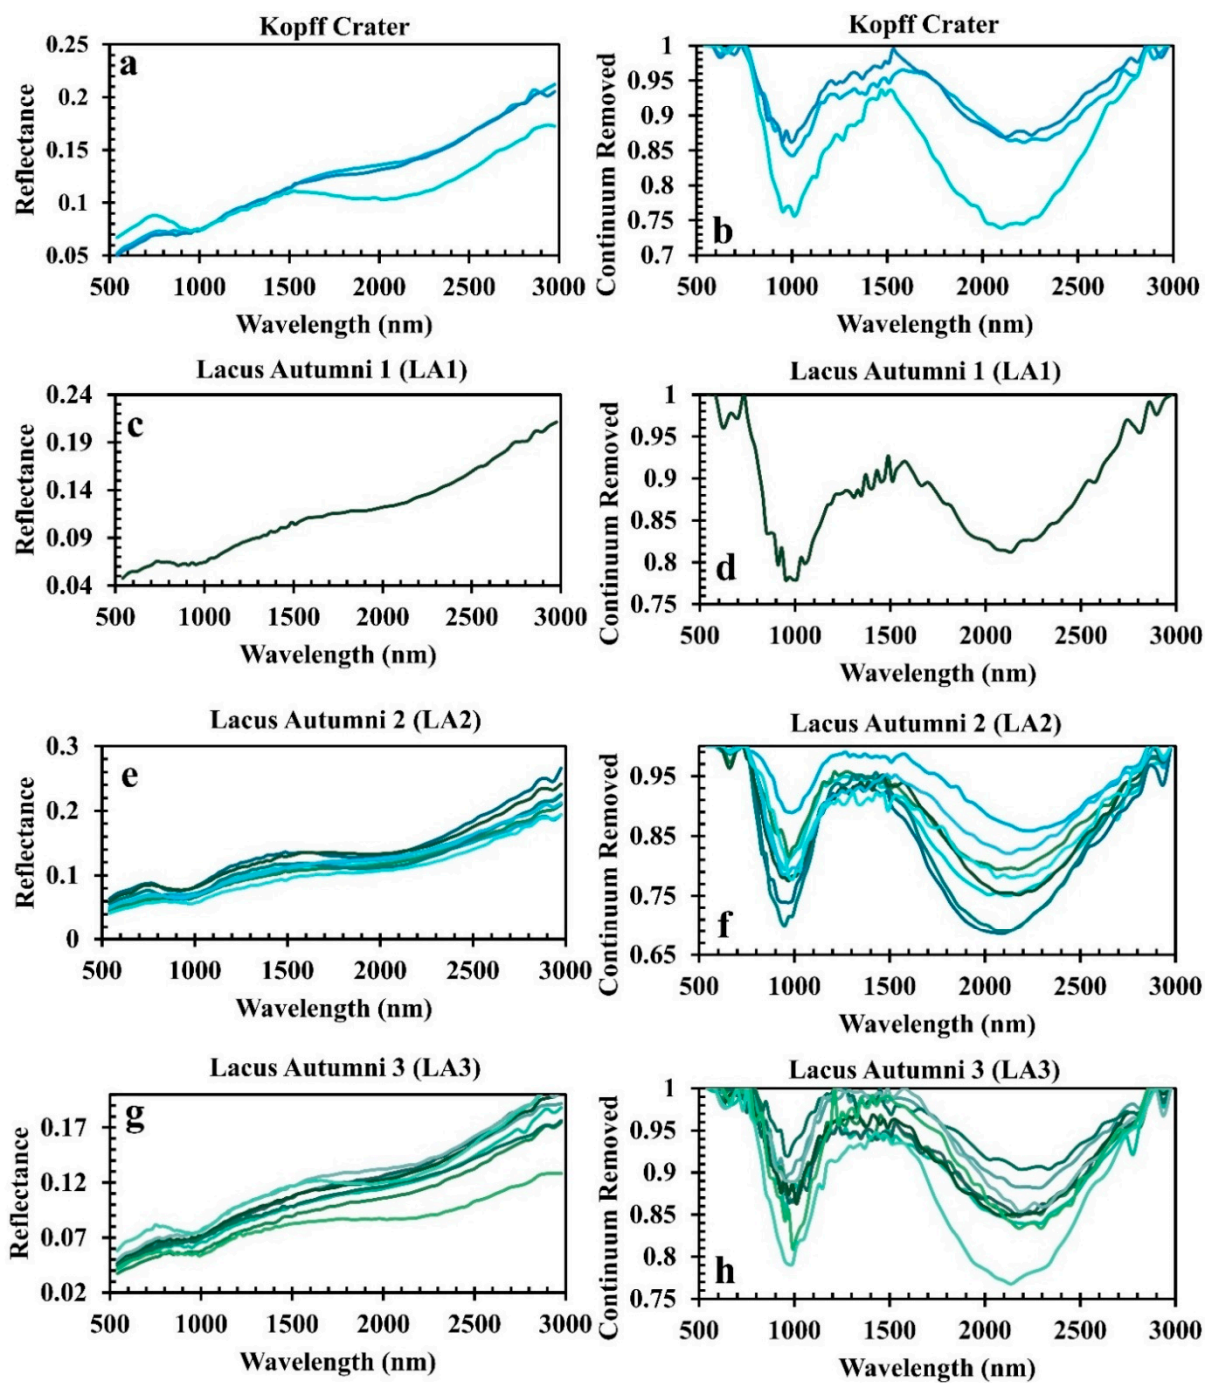

Figure S3: Reflectance spectra of different minerals from the Kopff Crater and Lacus Autumni region are shown in (a-h) . Normal reflectance spectra and continuum-removed reflectance spectra for K, LA1, LA2, and LA3 basaltic units have been plotted. The locations where spectra were collected have been identified and marked in Figure 4.4d.
